# Supplementary material for: Treatment Effects of Interleukin-6 Receptor Antibodies for Modulating the Systemic Inflammatory Response After Out-of-Hospital Cardiac Arrest (The IMICA Trial): A Double-Blinded, Placebo-Controlled, Single-Center, Randomized, Clinical Trial
Source: PubMed Central journal article supplement — Circulation. 2021 Mar 22;143(19):1841–51. doi: 10.1161/CIRCULATIONAHA.120.053318 (PMC8104015; doi:10.1161/circulationaha.120.053318), 2021-03-22
Supplement: cir-143-1841-s001.pdf [file cir-143-1841-s001.pdf]

## **SUPPLEMENTAL MATERIAL**

Supplemental material for the manuscript:

*Treatment effects of Interleukin-6 Receptor Antibodies for Modulating the Systemic Inflammatory Response after Out-of-Hospital Cardiac Arrest (The IMICA trial): a double-blinded, placebo-controlled, single-center, randomized clinical trial.*

Figure I. Observed values of CRP

A

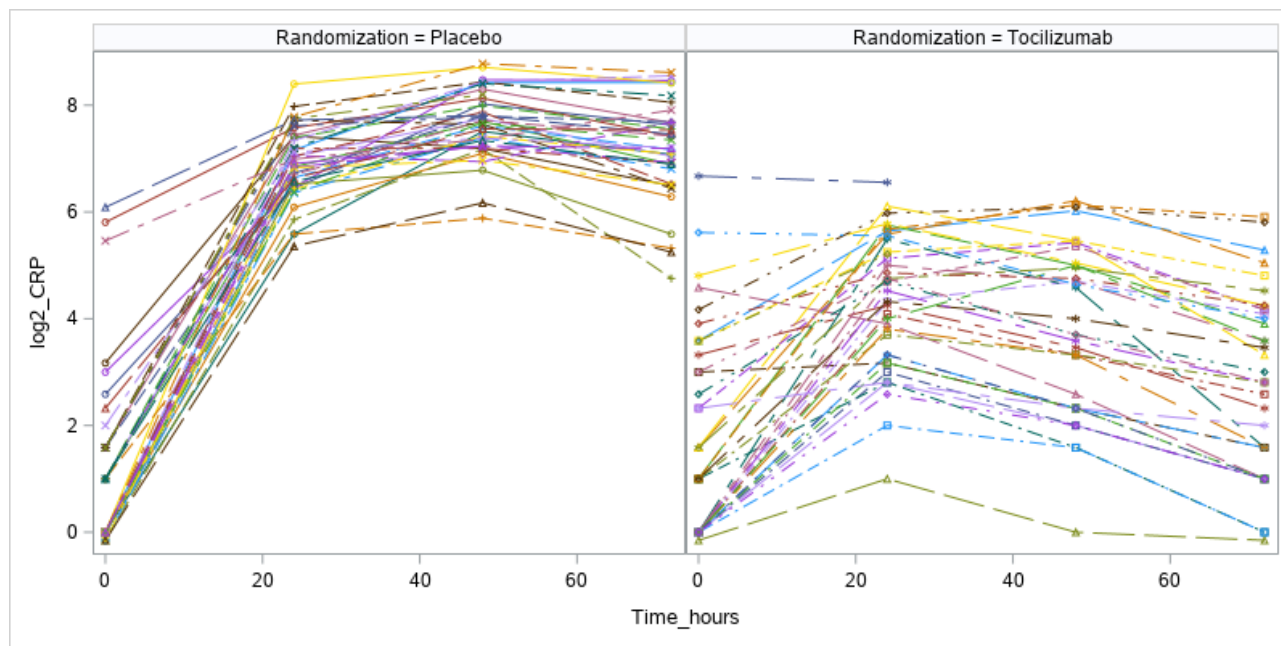

B

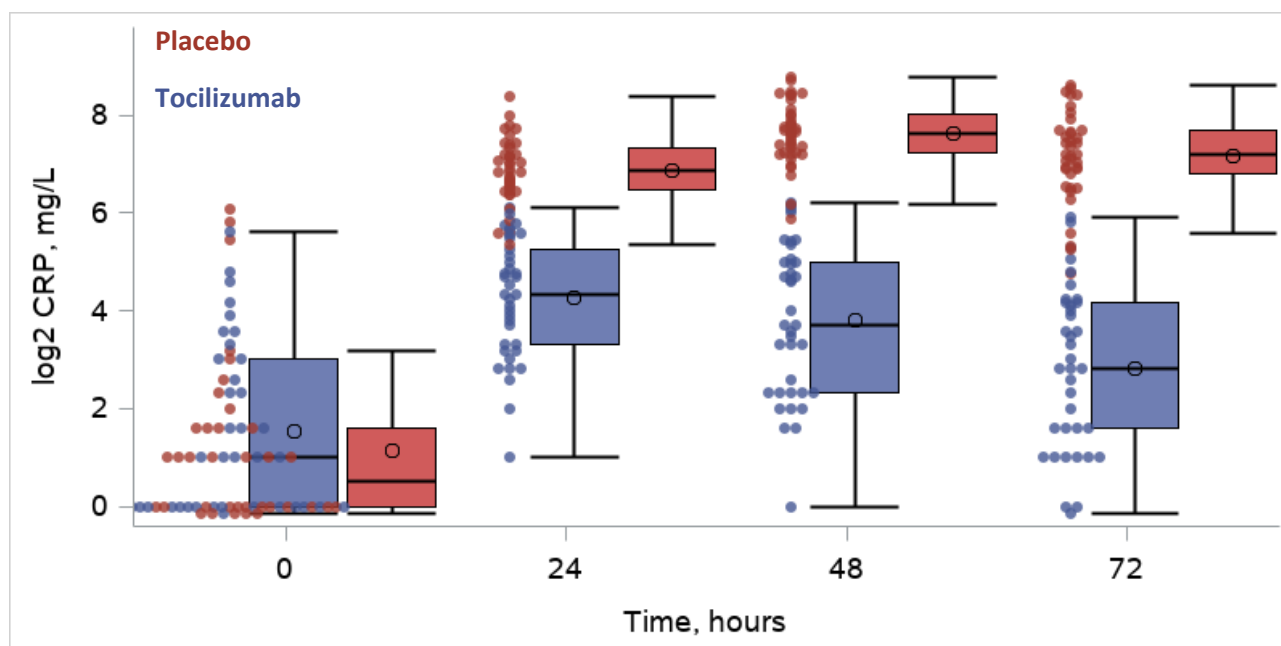

Legend: Observed values of CRP. A) Data overview: Spaghetti plot with log2 transformed individual values for all patients. B) Complete cases: Box-plot with an overlay of individual values after log2 transformation for patients with available values for all scheduled samples only. CRP: C-reactive protein.

Figure II. Observed values of leukocytes

A

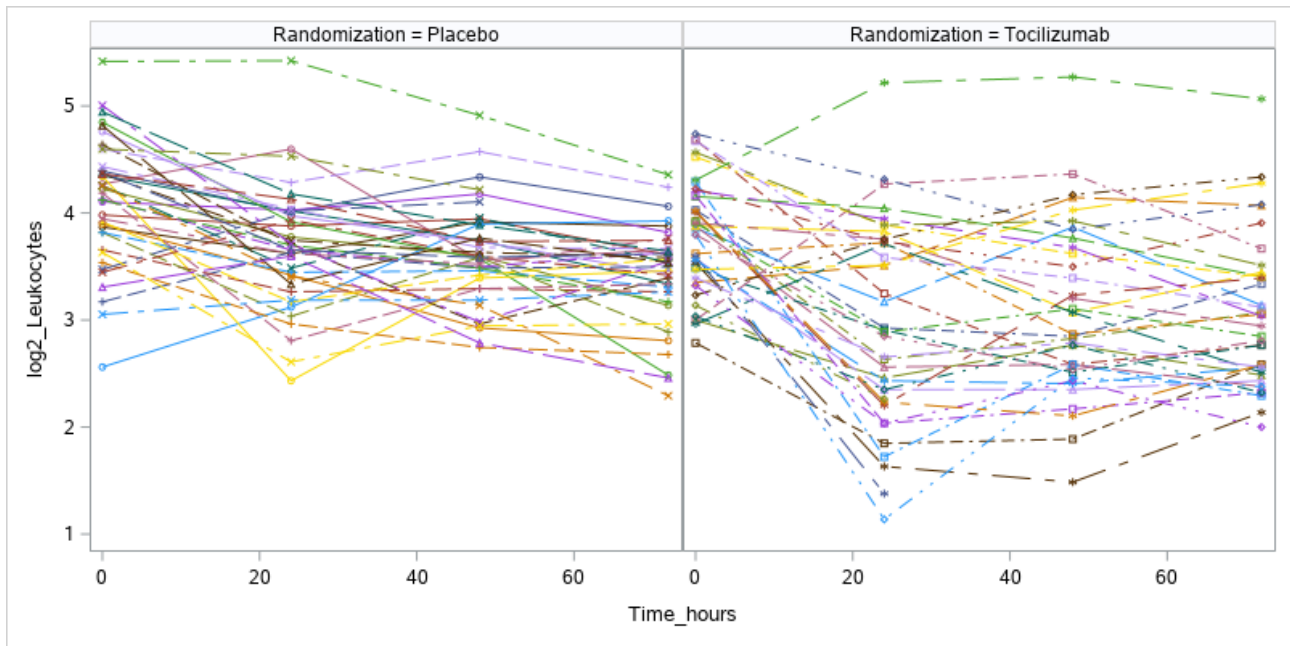

B

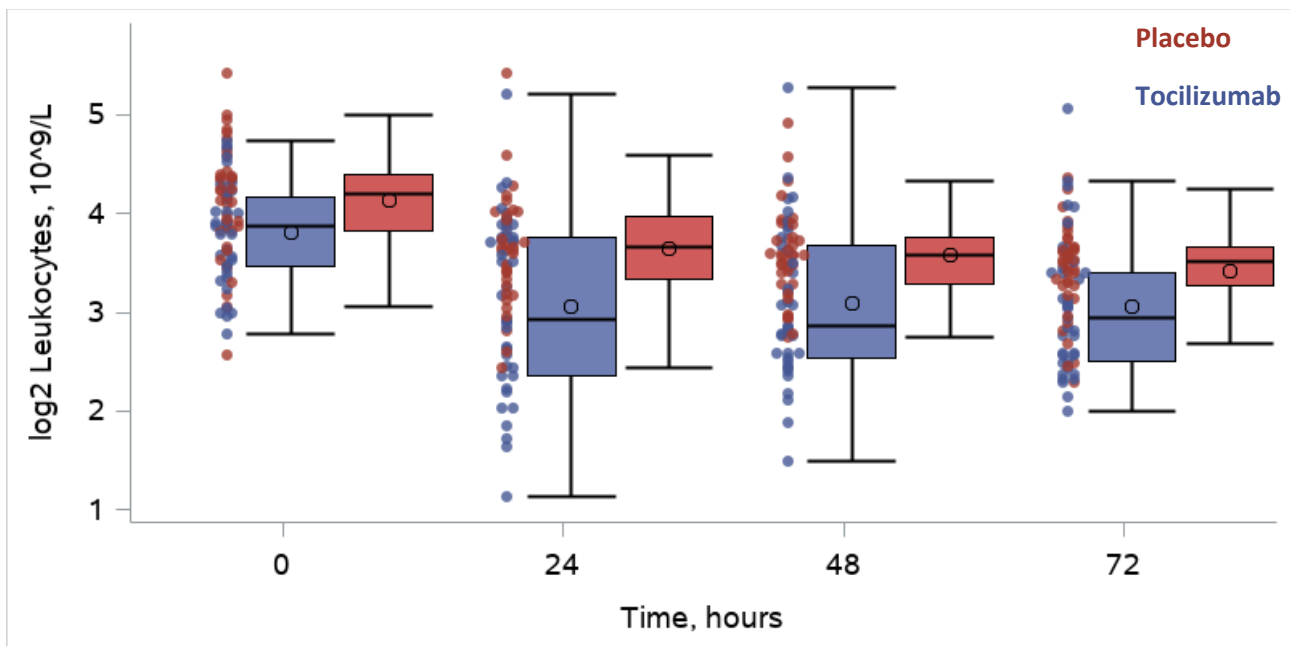

Legend: Observed values of Leukocytes. A) Data overview: Spaghetti plot with log<sub>2</sub> transformed individual values for all patients. B) Complete cases: Box-plot with an overlay of individual values after log<sub>2</sub> transformation for patients with available values for all scheduled samples only.

Figure III. Observed values of TnT

A

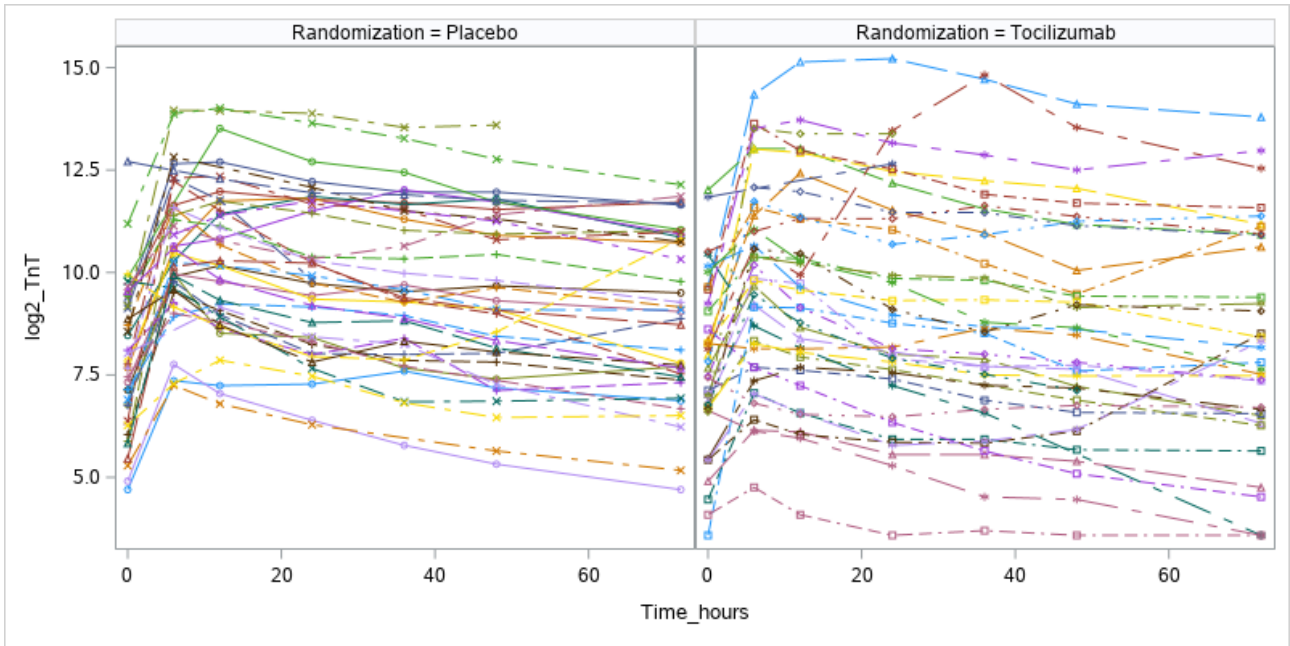

B

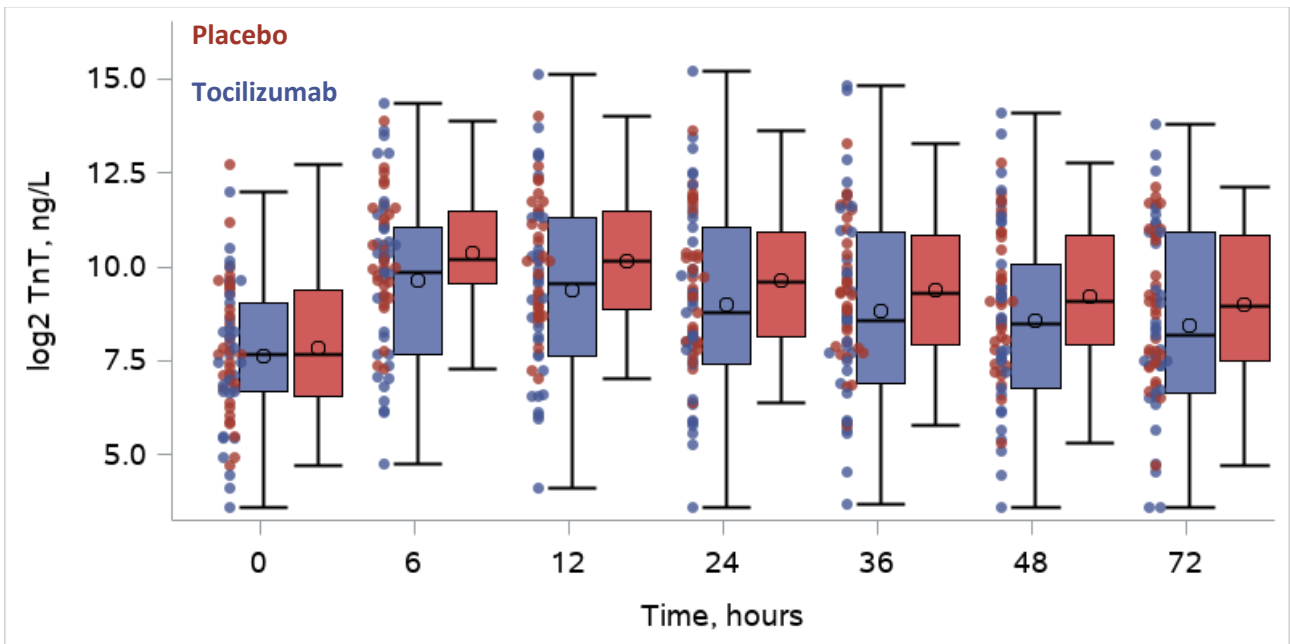

Legend: Observed values of TnT. A) Data overview: Spaghetti plot with  $\log_2$  transformed individual values for all patients. B) Complete cases: Box-plot with an overlay of individual values after  $\log_2$  transformation for patients with available values for all scheduled samples only. TnT: Troponin T.

Figure IV. Observed values of CKMB

A

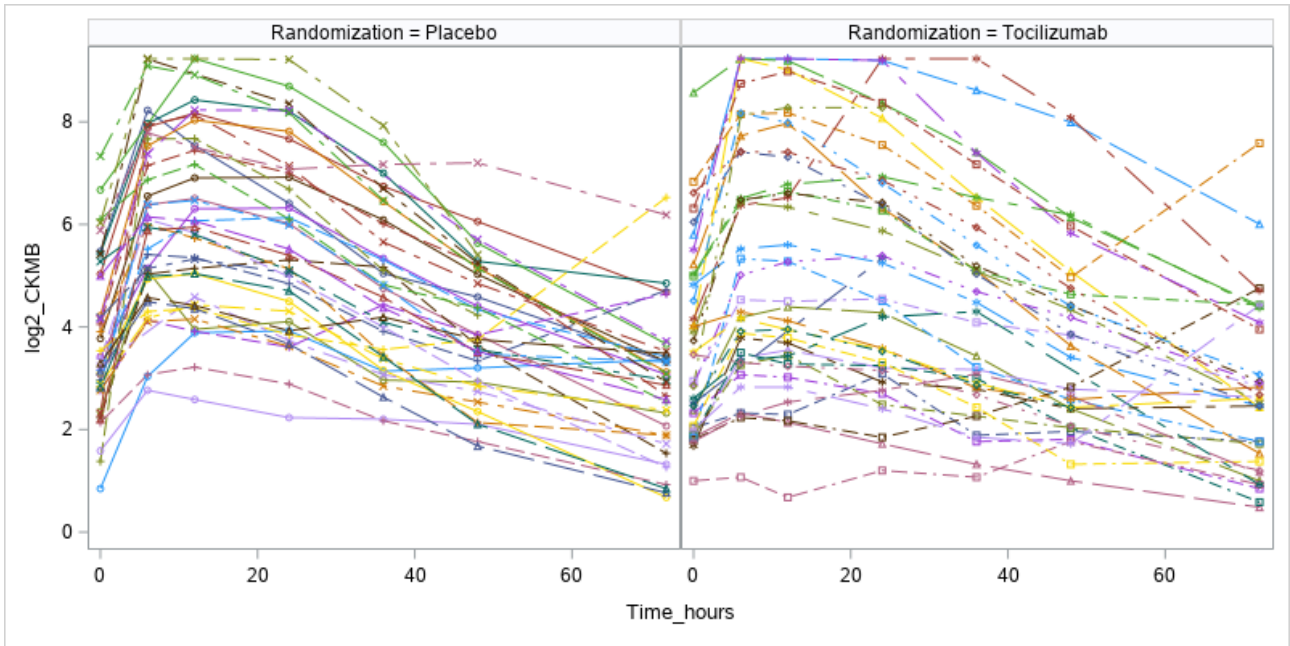

B

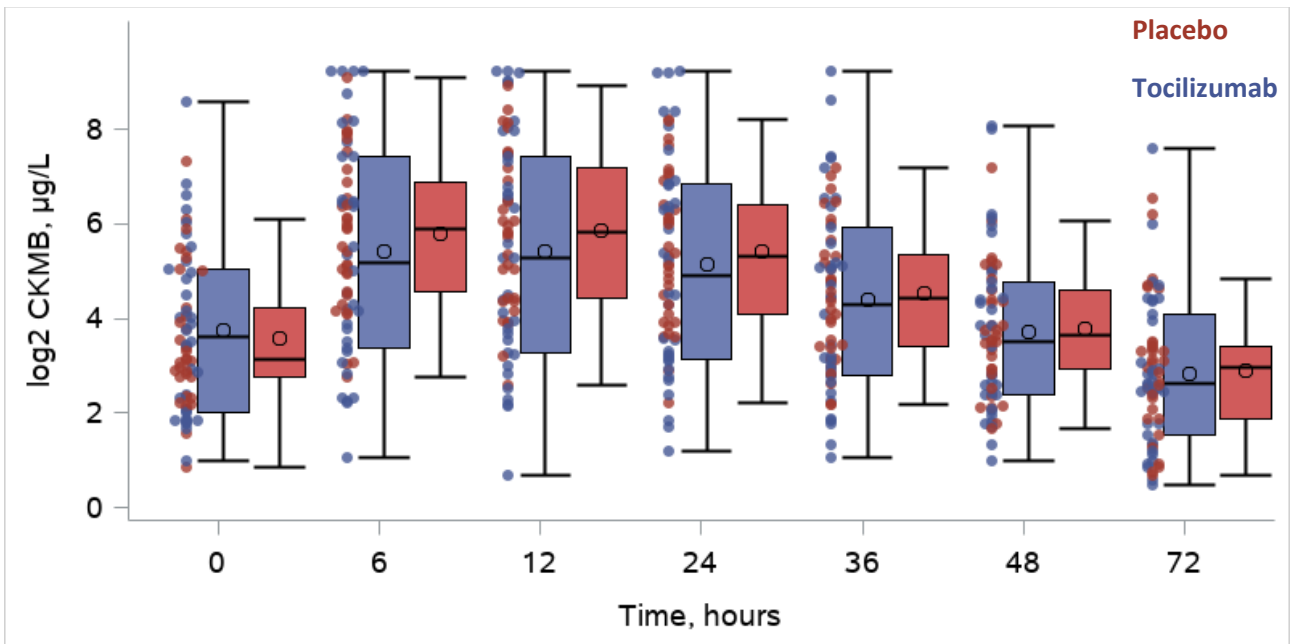

Legend: Observed values of CKMB. A) Data overview: Spaghetti plot with log<sub>2</sub> transformed individual values for all patients. B) Complete cases: Box-plot with an overlay of individual values after log<sub>2</sub> transformation for patients with available values for all scheduled samples only. CKMB: Creatine kinase myocardial band.

Figure V. Observed values of NT-proBNP

A

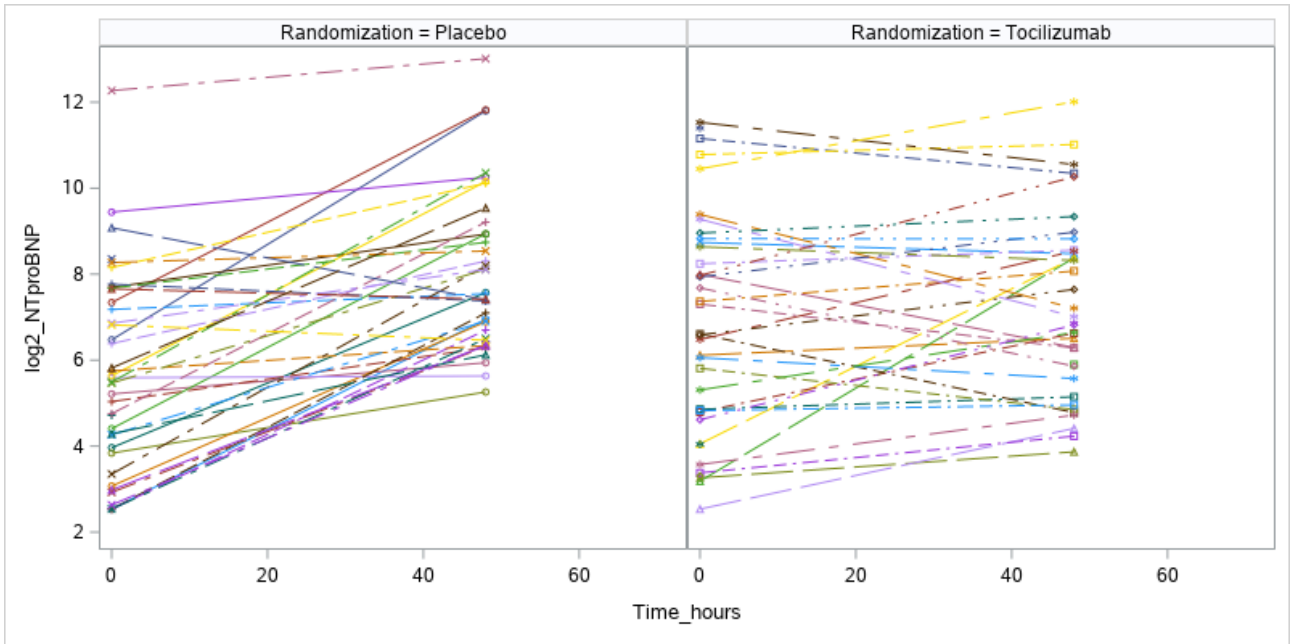

B

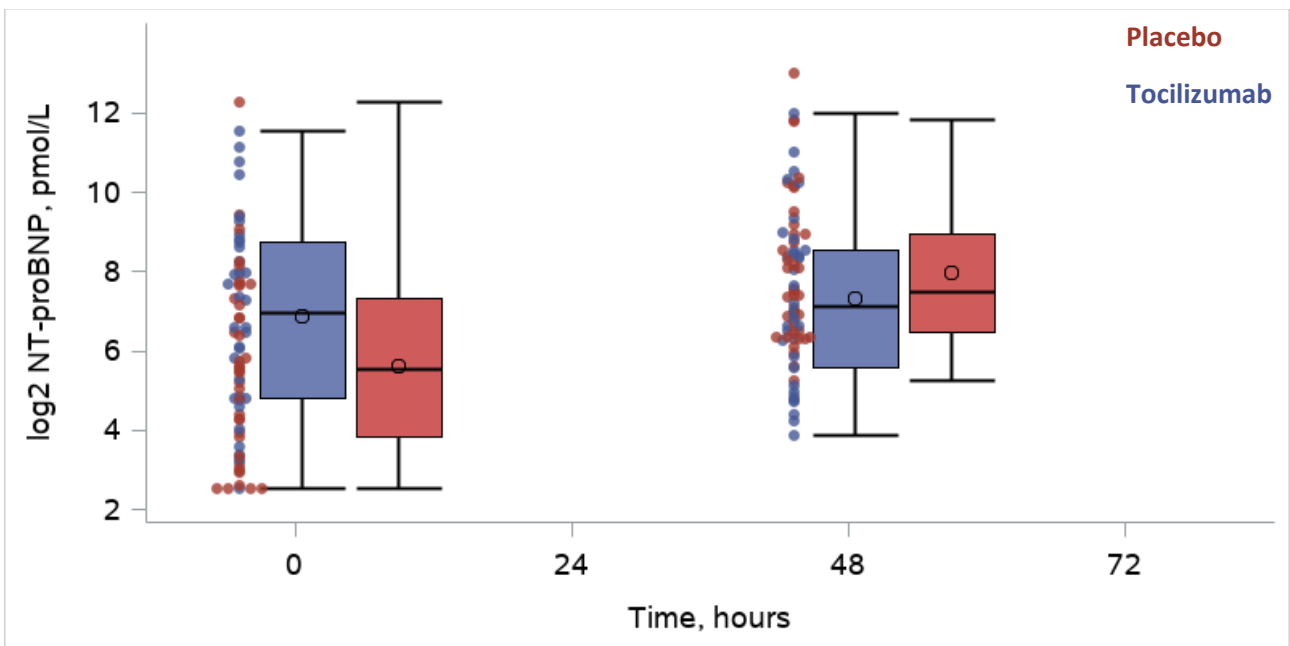

Legend: Observed values of NT-proBNP. A) Data overview: Spaghetti plot with log<sub>2</sub> transformed individual values for all patients. B) Complete cases: Box-plot with an overlay of individual values after log<sub>2</sub> transformation for patients with available values for all scheduled samples only. NT-proBNP: N-terminal pro B-type.
